# Supplementary material for: A cationic sulfur-hydrocarbon triradical with an excited quartet state
Source: Royal Society of Chemistry journal article supplement (doi:10.1039/d1cc06904g), 2022-01-01
Supplement: d1cc06904g1.pdf [file d1cc06904g1.pdf]

## Electronic Supplementary Information (ESI†)

### **A Cationic Sulfur-Hydrocarbon Triradical with an Excited Quartet State**

Shuxuan Tang,<sup>a</sup> Huapeng Ruan,<sup>a</sup> Zhaobo Hu,<sup>a</sup> Yue Zhao,<sup>a</sup> You Song<sup>a</sup> and Xinping Wang<sup>\*a</sup>

<sup>a</sup>State Key Laboratory of Coordination Chemistry, School of Chemistry and Chemical Engineering, Collaborative Innovation Center of Advanced Microstructures, Nanjing University, Nanjing 210023, China

\*E-mail: xpwang@nju.edu.cn

# Contents

|                                                                                                                                          |     |
|------------------------------------------------------------------------------------------------------------------------------------------|-----|
| <b>General</b> .....                                                                                                                     | S3  |
| Synthesis of <b>1</b> .....                                                                                                              | S4  |
| Scheme S1 Synthesis of <b>1</b> .....                                                                                                    | S4  |
| Fig. S1 <sup>1</sup> H NMR spectrum of <b>1</b> in (CD <sub>3</sub> ) <sub>2</sub> SO.....                                               | S5  |
| Fig. S2 <sup>13</sup> C NMR spectrum of <b>1</b> in (CD <sub>3</sub> ) <sub>2</sub> SO.....                                              | S5  |
| Synthesis of <b>2a</b> .....                                                                                                             | S6  |
| Synthesis of <b>2b</b> .....                                                                                                             | S6  |
| Fig. S3 Cyclic voltammetry (CV) and differential pulse voltammetry (DPV) of <b>1</b> .....                                               | S6  |
| Table S1 Crystal Data and Structure Refinement for <b>1</b> , <b>2a</b> , and <b>2b</b> .....                                            | S7  |
| Table S2 Selected Bond Distances.....                                                                                                    | S7  |
| Fig. S4 Thermal ellipsoid (30%) drawing of <b>1</b> .....                                                                                | S8  |
| Fig. S5 Thermal ellipsoid (30%) drawing of the trication part for <b>2a</b> .....                                                        | S8  |
| Fig. S6 Thermal ellipsoid (30%) drawing of the trication part for <b>2b</b> .....                                                        | S9  |
| Fig. S7 Crystal packing of <b>1</b> .....                                                                                                | S9  |
| Fig. S8 The one-dimensional pore passages in the crystal structure of <b>1</b> .....                                                     | S10 |
| Fig. S9 Crystal packing of <b>2a</b> .....                                                                                               | S10 |
| <b>Continuous-Wave EPR Measurements and Simulation</b> .....                                                                             | S11 |
| Fig. S10 Calculated Zeeman splitting and allowed transitions at <i>x</i> , <i>y</i> , and <i>z</i> axis for <b>2a</b> .....              | S11 |
| Fig. S11 The EPR spectrum of <b>2a</b> powder at room temperature.....                                                                   | S12 |
| Fig. S12 The EPR spectrum of <b>2a</b> powder at 88 K.....                                                                               | S12 |
| Fig. S13 Frozen-solution EPR spectrum of 1×10 <sup>-4</sup> M <b>2b</b> in DBP at 88 K and the simulated spectrum.....                   | S13 |
| Fig. S14 The EPR spectrum of <b>2b</b> powder at room temperature.....                                                                   | S13 |
| Fig. S15 The EPR spectrum of <b>2b</b> powder at 88 K.....                                                                               | S13 |
| <b>Pulse EPR Measurements</b> .....                                                                                                      | S14 |
| Fig. S16 Spin-lattice relaxation times ( <i>T</i> <sub>1</sub> ) measurements of <b>2a</b> .....                                         | S14 |
| Fig. S17 Coherence times ( <i>T</i> <sub>2</sub> ) measurements of <b>2a</b> .....                                                       | S15 |
| Fig. S18 FSED EPR spectrum of <b>2a</b> at 6 K.....                                                                                      | S15 |
| Table S3 Variable-Temperature Inversion Recovery Curves for <b>2a</b> .....                                                              | S16 |
| Table S4 Variable-Temperature Echo-Decay Curves for <b>2a</b> .....                                                                      | S17 |
| <b>SQUID Measurements</b> .....                                                                                                          | S19 |
| Fig. S19 Comparison between the $\chi_M T$ versus <i>T</i> curves for <b>2a</b> and <b>2b</b> .....                                      | S19 |
| <b>DFT Calculations</b> .....                                                                                                            | S20 |
| Table S5 Energy Data of DFT Calculations.....                                                                                            | S20 |
| Table S6 Calculated Bond Distances of the Sulfur-Hydrocarbons for <b>1</b> and the Triradical Trication in <b>2a</b> and <b>2b</b> ..... | S21 |
| Table S7 Calculated Mulliken Population of the Triradical Trication.....                                                                 | S22 |
| Fig. S20 Calculated spin density distribution of the triradical trication in the doublet state.....                                      | S23 |
| Fig. S21 Calculated spin density distribution of the triradical trication in the quartet state.....                                      | S23 |
| Coordinates of the studied molecules.....                                                                                                | S24 |
| <b>References</b> .....                                                                                                                  | S26 |
| <b>Author Contributions</b> .....                                                                                                        | S26 |

## General

All experiments were carried out under a nitrogen atmosphere by using standard Schlenk techniques and an argon-filled glovebox. Solvents were purified under the standard procedure.  $\text{ClCH}_2\text{CH}_2\text{Cl}$  was distilled from  $\text{CaH}_2$  and stored in molecular sieve. Dibutyl phthalate (DBP) was dried through molecular sieve. All of the solvents were degassed before using. Potassium carbonate was purchased and used upon arrival. 2,3,6,7,14,15-hexabromotriptycene, 1,2-benzenedithiol and  $\text{NO}[\text{Al}(\text{OR}_F)_4]$  ( $\text{OR}_F = \text{OC}(\text{CF}_3)_3$ ) were synthesized according to the reported procedures.<sup>S1–S3</sup> The  $^1\text{H}$  NMR and  $^{13}\text{C}$  NMR spectra were obtained with a Bruker Ultra Shield 400 MHz spectrometer using  $(\text{CD}_3)_2\text{SO}$  as solvent and the data were listed in ppm referenced with internal standard  $\text{Me}_4\text{Si}$ . Single crystal X-ray diffraction was carried out by using a Bruker D8 CMOS detector. The structures were solved by direct methods and all refined on  $F^2$  with the SHELX-2018 and Olex2 software package. The positions of the H atoms were calculated and considered isotropically according to a riding model. Cyclic voltammetry (CV) and differential pulse voltammetry (DPV) were performed on a CHI660E electrochemical workstation with platinum as the working and counter electrode, and  $\text{Ag}/\text{AgCl}$  electrode as reference. Freshly distilled  $\text{ClCH}_2\text{CH}_2\text{Cl}$  was used as the solvent and  $n\text{-Bu}_4\text{NPF}_6$  ( $10^{-1}$  M) was used as electrolyte. Continuous-wave EPR (CW-EPR) spectra were obtained using a Bruker EMX plus-6/1 variable-temperature apparatus and were simulated with the software of WINEPR SimFonia. The Zeeman splitting of **2a** was calculated using Easyspin on the basis of the simulation result.<sup>S4</sup> Pulse X-band EPR data were obtained on a CIQTEK EPR100 Spectrometer. Magnetic measurements were performed using a Quantum Design SQUID VSM magnetometer with a field of 0.1 T. UV–vis–NIR spectra were recorded on Lambda 750 spectrometer. Element analyses were performed at Shanghai Institute of Organic Chemistry, the Chinese Academy of Sciences.

## Discussions on the oxidation reactions

It has to be noticed that we also carried out the oxidation reactions of **1** with other oxidants and solvents:

1. The reaction between **1** and  $\text{NOSbF}_6$  in  $\text{CH}_2\text{Cl}_2$  only resulted in insoluble dark blue powder with unreacted  $\text{NOSbF}_6$  crystallite. This phenomenon is perhaps due to the low solubility of both  $\text{NOSbF}_6$  and the radical product.
2. The reaction between **1** and  $\text{NOSbF}_6$  in  $\text{SO}_2$  (l) through a thick wall H-shaped Schlenk flask at room temperature resulted in insoluble dark blue powder. The  $\text{NOSbF}_6$  features a relatively high solubility in  $\text{SO}_2$  (l), which means that the finally insoluble powder might due to the low solubility of the radical product.
3. The reaction between **1** and  $\text{NO}[\text{Al}(\text{OR}_F)_4]$  in  $\text{CH}_2\text{Cl}_2$  first resulted in dark blue solution, then insoluble dark blue powder quickly formed. This phenomenon is perhaps due to the reactions between the radical product and the  $\text{CH}_2\text{Cl}_2$  solvent molecule.

In summary, taken the solubility of both oxidant and product into consideration, the oxidant  $\text{NO}[\text{Al}(\text{OR}_F)_4]$  was finally selected. Considering that  $\text{CH}_2\text{Cl}_2$  solvent molecule may react with the radical product,  $\text{ClCH}_2\text{CH}_2\text{Cl}$  was finally used, in view of both solubility and stability of the radical product.

## Discussions on the solvent of frozen-solution CW-EPR measurements

The frozen-solution CW-EPR measurements of **2a** and **2b** were also carried out using  $\text{ClCH}_2\text{CH}_2\text{Cl}$  as the solvent. However, zero-field splitting was not observed, which was probably due to the relatively high polarity of  $\text{ClCH}_2\text{CH}_2\text{Cl}$ .

DBP was finally used as the solvent in CW-EPR measurements, which features a relatively low polarity and acceptable solubility of **2a** and **2b**.

**Synthesis of 1:** A mixture of 2,3,6,7,14,15-hexabromotriptycene (364 mg, 0.5 mmol), 1,2-benzenedithiol (426 mg, 3.0 mmol) and potassium carbonate (414 mg, 3.0 mmol) in DMF (30 mL) was refluxed (150 °C) for 12 h under N<sub>2</sub> protection. After cooled down to room temperature and addition of methanol (50 mL), the mixture was stirred for 10 min and then filtered. The residue was purified by chromatography on silica gel using petroleum ether/chloroform = 1/2 as eluent. The compound **1** was obtained as white solid. The crystals suitable for single-crystal X-ray diffraction were obtained by slowly evaporating a saturated mixture solvent (petroleum ether/chloroform = 1/2) solution of **1**. Yield: 0.180 g, 54%. <sup>1</sup>H NMR (400 MHz, (CD<sub>3</sub>)<sub>2</sub>SO, ppm): δ 7.55 (s, 6 H, phenyl-H), 7.53 (m, 6 H, phenyl-H), 7.30 (m, 6 H, phenyl-H), 5.54 (s, 2 H, CH); <sup>13</sup>C NMR (100.61 MHz, (CD<sub>3</sub>)<sub>2</sub>SO, ppm): δ 144.44, 134.56, 131.39, 128.69, 128.19, 124.23, 50.34.

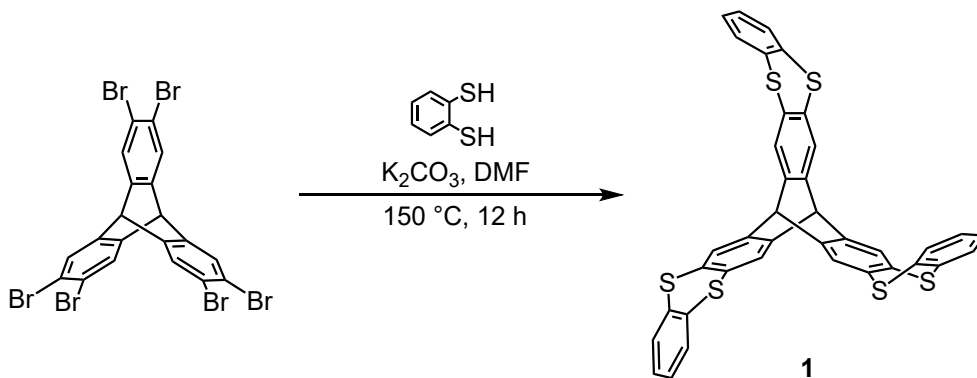

**Scheme S1** Synthesis of **1**.

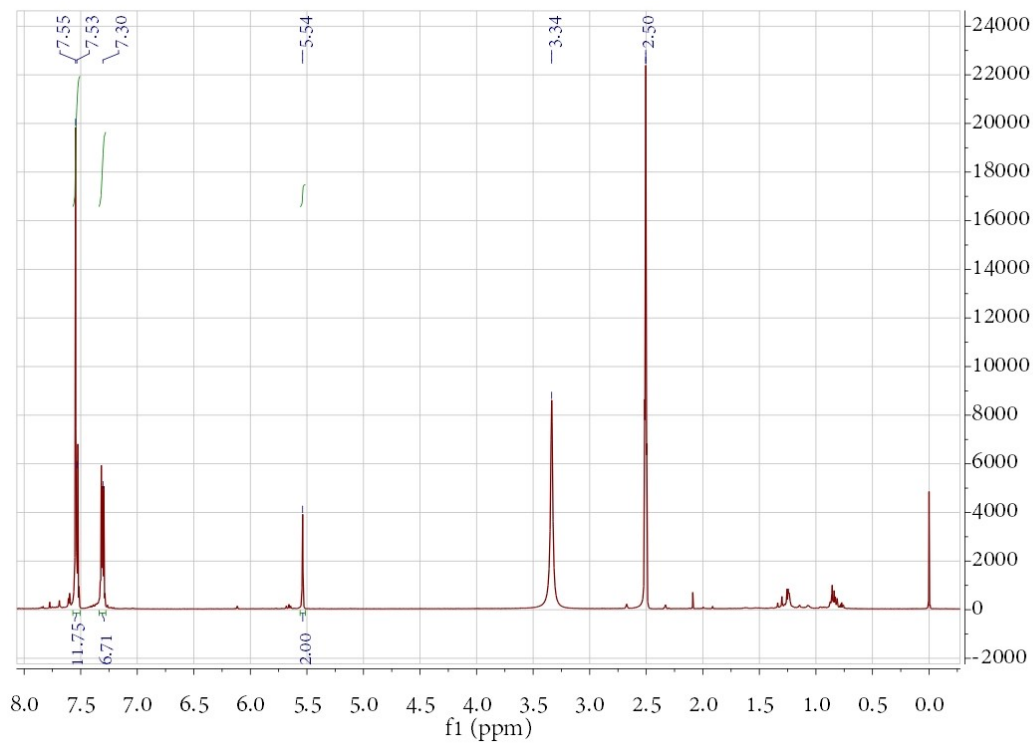

**Fig. S1** <sup>1</sup>H NMR spectrum of **1** in (CD<sub>3</sub>)<sub>2</sub>SO.

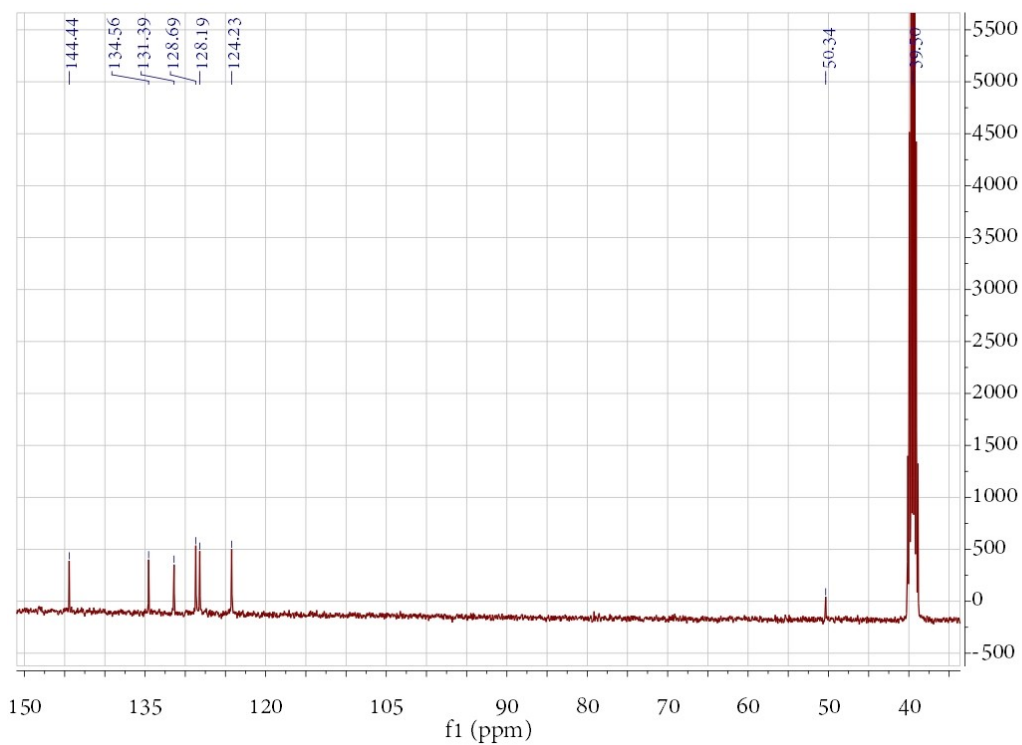

**Fig. S2** <sup>13</sup>C NMR spectrum of **1** in (CD<sub>3</sub>)<sub>2</sub>SO.

**Synthesis of 2a:** Under anaerobic and anhydrous condition, solution of  $\text{NO}[\text{Al}(\text{OR}_F)_4]$  (152 mg, 0.152 mmol) in  $\text{ClCH}_2\text{CH}_2\text{Cl}$  (20 mL) was added dropwise to a suspension of **1** (33 mg, 0.050 mmol) in  $\text{ClCH}_2\text{CH}_2\text{Cl}$  (30 mL). The reaction mixture was stirred at room temperature for 12 h. The resultant dark purple mixture was filtered and the filtrate was then concentrated and left in a  $-35\text{ }^\circ\text{C}$  fridge for 12 h to form dark blue crystals of **2a**. Yield: 0.031 g, 17%. Elemental analysis for  $\text{C}_{88}\text{H}_{24}\text{Al}_3\text{Cl}_2\text{F}_{108}\text{O}_{12}\text{S}_6$  (%), caclcd: C 28.81; H 0.66; found: C 28.93; H 0.70.

**Synthesis of 2b:** The synthesis procedure of **2b** is similar to that of **2a**. Under anaerobic and anhydrous condition, solution of  $\text{NO}[\text{Al}(\text{OR}_F)_4]$  (152 mg, 0.152 mmol) in  $\text{ClCH}_2\text{CH}_2\text{Cl}$  (20 mL) was added dropwise to a suspension of **1** (33 mg, 0.050 mmol) in  $\text{ClCH}_2\text{CH}_2\text{Cl}$  (30 mL). The reaction mixture was stirred at room temperature for 12 h. The resultant dark purple mixture was filtered and the filtrate was then concentrated and left at room temperature for 2 days to form dark blue crystals of **2b**. Yield: 0.039 g, 21%. Elemental analysis for  $\text{C}_{86}\text{H}_{20}\text{Al}_3\text{F}_{108}\text{O}_{12}\text{S}_6$  (%), caclcd: C 28.93; H 0.56; found: C 29.11; H 0.62.

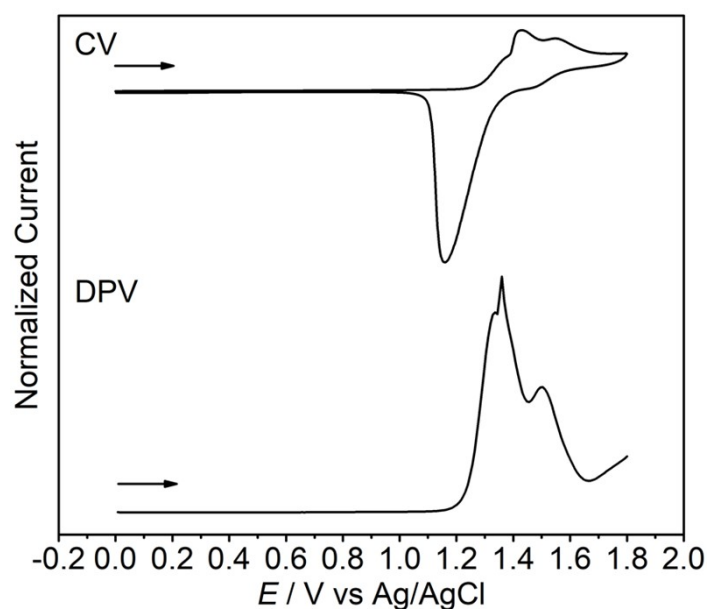

**Fig. S3** Cyclic voltammetry (CV) and differential pulse voltammetry (DPV) of **1**.

**Table S1** Crystal Data and Structure Refinement for **1**, **2a**, and **2b**

|                                                             | <b>1</b>                                       | <b>2a</b>                                                                                                       | <b>2b</b>                                                                                       |
|-------------------------------------------------------------|------------------------------------------------|-----------------------------------------------------------------------------------------------------------------|-------------------------------------------------------------------------------------------------|
| Empirical formula                                           | C <sub>38</sub> H <sub>20</sub> S <sub>6</sub> | C <sub>88</sub> H <sub>24</sub> Al <sub>3</sub> Cl <sub>2</sub> F <sub>108</sub> O <sub>12</sub> S <sub>6</sub> | C <sub>86</sub> H <sub>20</sub> Al <sub>3</sub> F <sub>108</sub> O <sub>12</sub> S <sub>6</sub> |
| Formula weight (g mol <sup>-1</sup> )                       | 668.90                                         | 3669.27                                                                                                         | 3570.32                                                                                         |
| Crystal system                                              | hexagonal                                      | triclinic                                                                                                       | monoclinic                                                                                      |
| Space group                                                 | <i>P</i> 6 <sub>3</sub> / <i>m</i>             | <i>P</i> -1                                                                                                     | <i>P</i> 2 <sub>1</sub> / <i>c</i>                                                              |
| <i>Z</i>                                                    | 2                                              | 2                                                                                                               | 4                                                                                               |
| Temperature (K)                                             | 193                                            | 193                                                                                                             | 193                                                                                             |
| $\mu$ (mm <sup>-1</sup> )                                   | 0.482                                          | 0.400                                                                                                           | 2.132                                                                                           |
| <i>a</i> (Å)                                                | 12.143(3)                                      | 12.318(2)                                                                                                       | 27.8747(14)                                                                                     |
| <i>b</i> (Å)                                                | 12.143(3)                                      | 17.946(3)                                                                                                       | 20.9396(11)                                                                                     |
| <i>c</i> (Å)                                                | 11.827(4)                                      | 27.986(5)                                                                                                       | 21.1968(11)                                                                                     |
| $\alpha$ (°)                                                | 90                                             | 88.353(5)                                                                                                       | 90                                                                                              |
| $\beta$ (°)                                                 | 90                                             | 88.861(5)                                                                                                       | 95.191(3)                                                                                       |
| $\gamma$ (°)                                                | 120                                            | 81.464(5)                                                                                                       | 90                                                                                              |
| Volume (Å <sup>3</sup> )                                    | 1510.2(9)                                      | 6114.6(18)                                                                                                      | 12321.5(11)                                                                                     |
| <i>R</i> <sub>1</sub> [ <i>I</i> > 2 $\sigma$ ( <i>I</i> )] | 0.1345                                         | 0.0839                                                                                                          | 0.1179                                                                                          |
| <i>wR</i> <sub>2</sub> [all data]                           | 0.2978                                         | 0.2620                                                                                                          | 0.2583                                                                                          |

**Table S2** Selected Bond Distances (Å)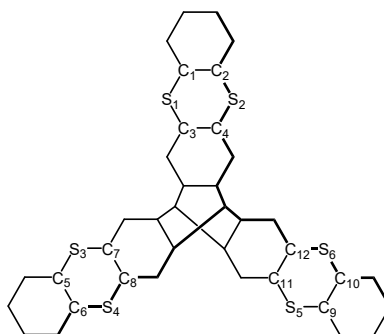

|                                 | <b>1</b>  | <b>2a</b> | <b>2b</b> |
|---------------------------------|-----------|-----------|-----------|
| S <sub>1</sub> -C <sub>1</sub>  | 1.769(10) | 1.719(5)  | 1.712(8)  |
| S <sub>1</sub> -C <sub>3</sub>  | 1.801(8)  | 1.721(4)  | 1.724(7)  |
| S <sub>2</sub> -C <sub>2</sub>  | 1.769(10) | 1.727(5)  | 1.707(8)  |
| S <sub>2</sub> -C <sub>4</sub>  | 1.801(8)  | 1.715(4)  | 1.726(7)  |
| S <sub>3</sub> -C <sub>5</sub>  | 1.769(10) | 1.724(5)  | 1.715(7)  |
| S <sub>3</sub> -C <sub>7</sub>  | 1.801(8)  | 1.718(5)  | 1.725(6)  |
| S <sub>4</sub> -C <sub>6</sub>  | 1.769(10) | 1.721(5)  | 1.710(6)  |
| S <sub>4</sub> -C <sub>8</sub>  | 1.801(8)  | 1.727(4)  | 1.724(6)  |
| S <sub>5</sub> -C <sub>9</sub>  | 1.769(10) | 1.714(5)  | 1.714(7)  |
| S <sub>5</sub> -C <sub>11</sub> | 1.801(8)  | 1.714(5)  | 1.716(6)  |
| S <sub>6</sub> -C <sub>10</sub> | 1.769(10) | 1.733(5)  | 1.723(6)  |
| S <sub>6</sub> -C <sub>12</sub> | 1.801(8)  | 1.726(5)  | 1.714(6)  |

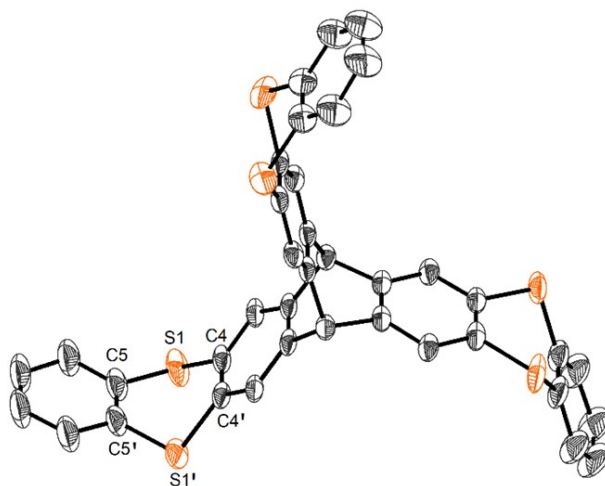

**Fig. S4** Thermal ellipsoid (30%) drawing of **1**. All hydrogen atoms are not shown for clarity. Selected bond lengths (Å) and bond angles (°): S1–C4 1.801(8), S1–C5 1.769(10), C4–C4' 1.35(2), C5–C5' 1.35(2), C5–S1–C4 98.6(4), S1–C4–C4' 121.0(3), S1–C5–C5' 121.5(4).

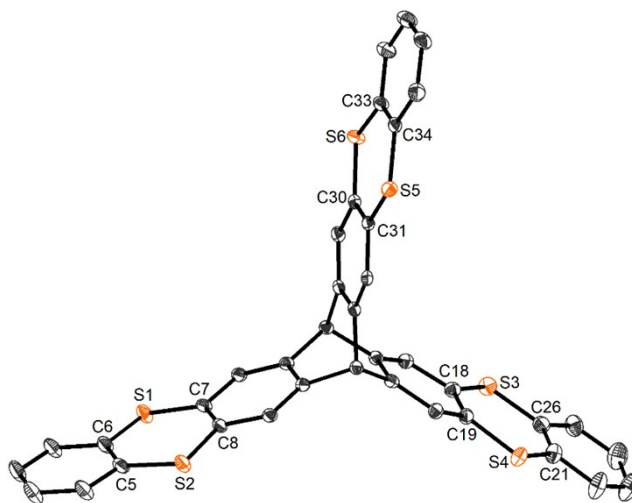

**Fig. S5** Thermal ellipsoid (30%) drawing of the trication part for **2a**. All hydrogen atoms are not shown for clarity. Selected bond lengths (Å) and bond angles (°): S1–C6 1.724(5), S1–C7 1.718(5), S2–C5 1.721(5), S2–C8 1.727(4), C5–C6 1.411(7), C7–C8 1.400(6), S3–C18 1.714(5), S3–C26 1.714(5), S4–C19 1.726(5), S4–C21 1.733(5), C18–C19 1.407(7), C21–C26 1.385(8), S5–C31 1.715(4), S5–C34 1.727(5), S6–C30 1.721(4), S6–C33 1.719(5), C30–C31 1.408(6), C33–C34 1.394(7), C6–S1–C7 107.2(2), C5–S2–C8 107.8(2), S1–C6–C5 126.1(4), S1–C7–C8 126.8(4), S2–C5–C6 125.7(4), S2–C8–C7 125.5(3), C18–S3–C26 107.4(2), C19–S4–C21 106.9(2), S3–C18–C19 126.9(4), S3–C26–C21 126.1(4), S4–C19–C18 125.3(3), S4–C21–C26 127.0(4), C31–S5–C34 107.5(2), C30–S6–C33 107.3(2), S5–C31–C30 125.5(3), S5–C34–C33 126.6(4), S6–C30–C31 126.8(3), S6–C33–C34 126.0(4).



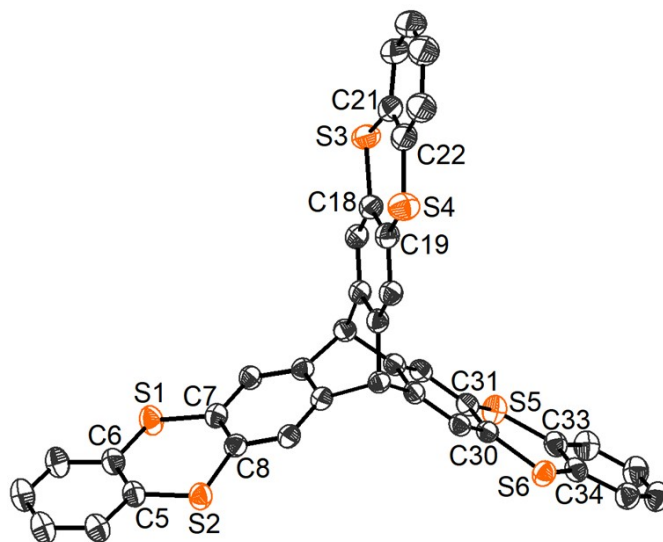

**Fig. S6** Thermal ellipsoid (30%) drawing of the trication part for **2b**. All hydrogen atoms are not shown for clarity. Selected bond lengths (Å) and bond angles (°): S1–C6 1.715(7), S1–C7 1.725(6), S2–C5 1.710(6), S2–C8 1.724(6), C5–C6 1.398(9), C7–C8 1.399(8), S3–C18 1.724(7), S3–C21 1.712(8), S4–C19 1.726(7), S4–C22 1.707(8), C18–C19 1.400(9), C21–C22 1.410(11), S5–C31 1.716(6), S5–C33 1.714(7), S6–C30 1.714(6), S6–C34 1.723(6), C30–C31 1.419(8), C33–C34 1.402(9), C6–S1–C7 107.5(3), C5–S2–C8 107.1(3), S1–C6–C5 125.8(5), S1–C7–C8 125.4(5), S2–C5–C6 126.4(5), S2–C8–C7 126.2(5), C18–S3–C21 107.4(4), C19–S4–C22 107.7(4), S3–C18–C19 126.1(5), S3–C21–C22 126.1(6), S4–C19–C18 125.9(5), S4–C22–C21 126.1(6), C31–S5–C33 107.4(3), C30–S6–C34 107.3(3), S5–C31–C30 125.9(5), S5–C33–C34 126.2(5), S6–C30–C31 125.9(5), S6–C34–C33 126.1(5).

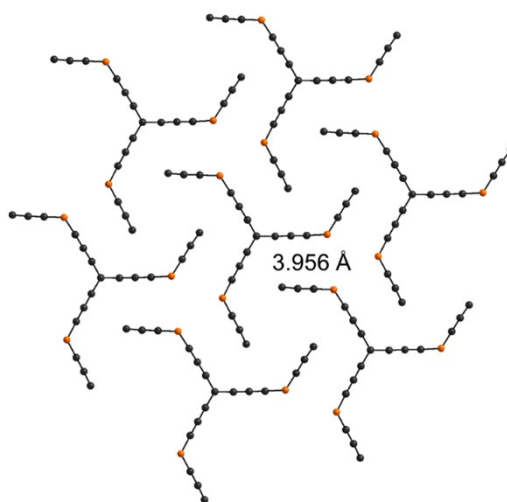

**Fig. S7** Crystal packing of **1**.

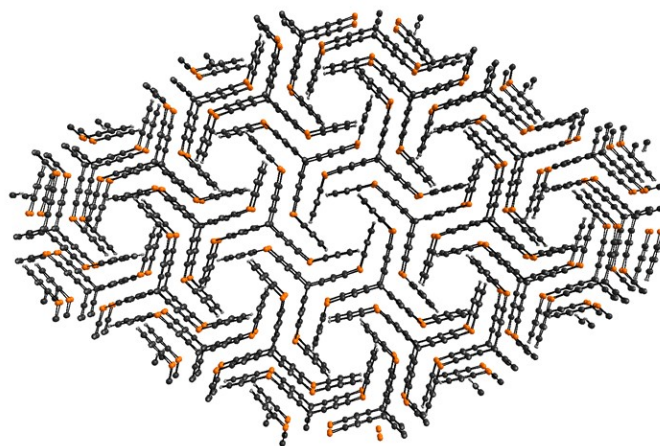

**Fig. S8** The one-dimensional pore passages in the crystal structure of **1**.

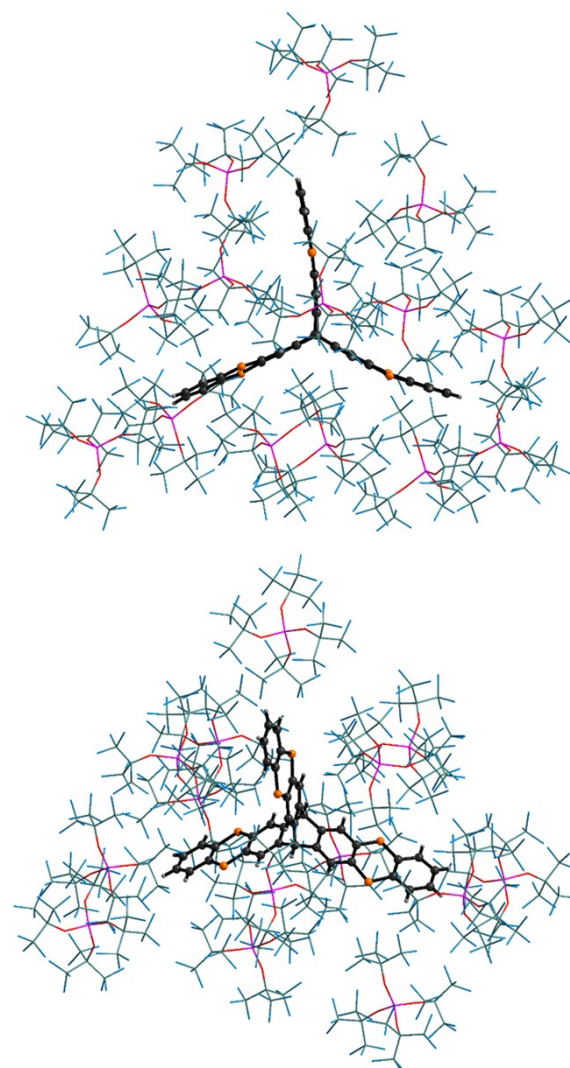

**Fig. S9** Crystal packing of **2a**.

## Continuous-Wave EPR Measurements and Simulation

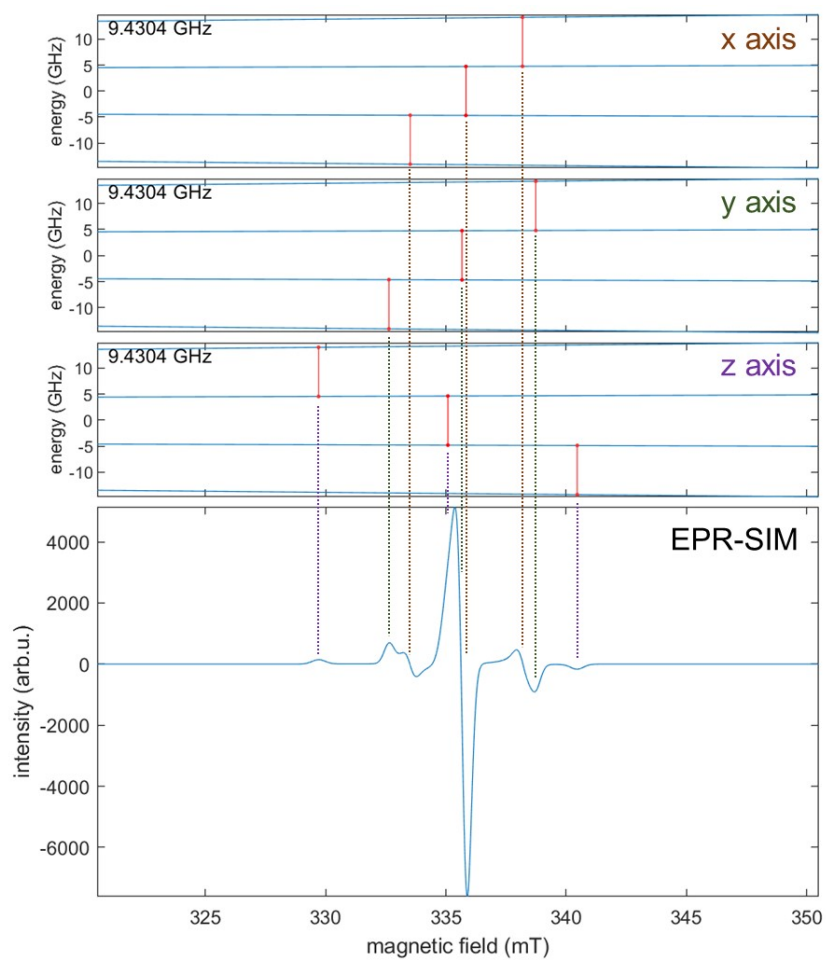

**Fig. S10** Calculated Zeeman splitting and allowed transitions ( $\Delta m_s = \pm 1$ ) at x, y, and z axis for **2a**.

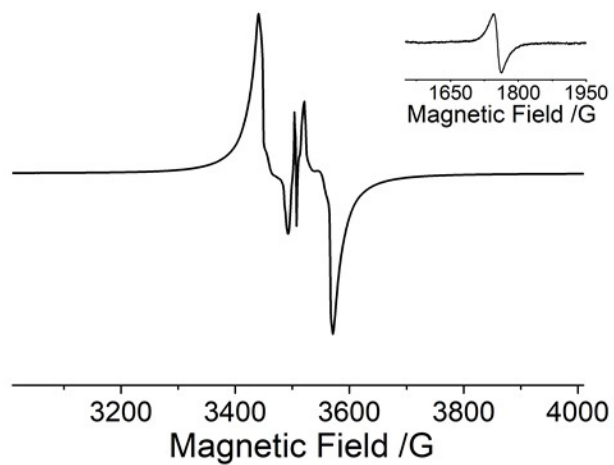

**Fig. S11** The EPR spectrum of **2a** powder at room temperature ( $\nu = 9.8526$  GHz).

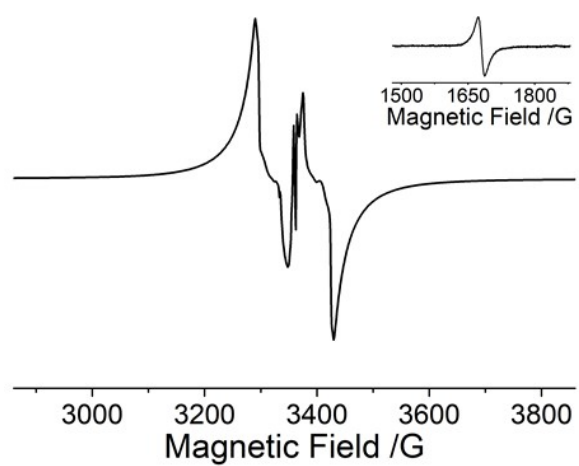

**Fig. S12** The EPR spectrum of **2a** powder at 88 K ( $\nu = 9.4395$  GHz).

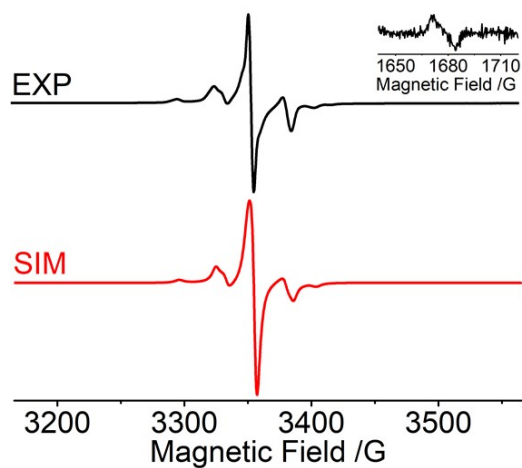

**Fig. S13** Frozen-solution EPR spectrum of  $1 \times 10^{-4}$  M **2b** in dibutyl phthalate (DBP) at 88 K (EXP,  $\nu = 9.4263$  GHz) and the simulated spectrum (SIM). The zero-field splitting (ZFS) parameters were simulated as  $D = 27.0$  G and  $E = 1.2$  G. The anisotropic  $g$  factors were simulated as  $g_x = 2.0065$ ,  $g_y = 2.0072$ , and  $g_z = 2.0105$ .

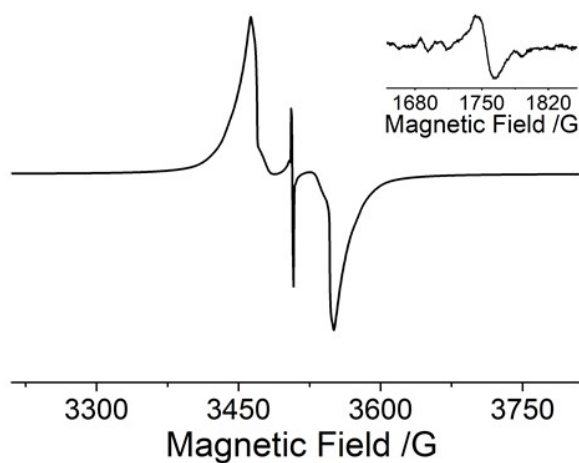

**Fig. S14** The EPR spectrum of **2b** powder at room temperature ( $\nu = 9.8565$  GHz).

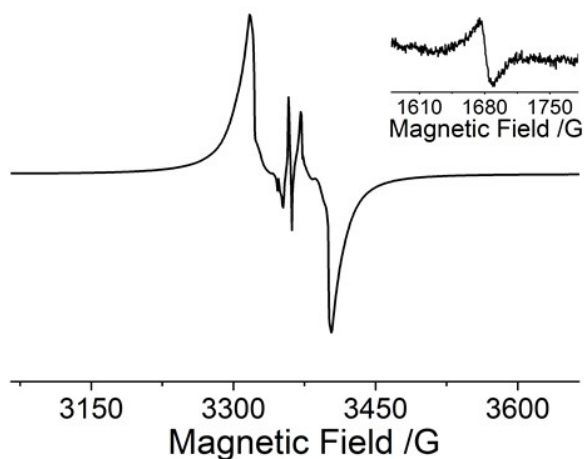

**Fig. S15** The EPR spectrum of **2b** powder at 88 K ( $\nu = 9.4443$  GHz).

## Pulse EPR Measurements

Pulse X-band EPR data were obtained on a CIQTEK EPR100 Spectrometer. The measurements were performed on the powder sample of **2a**.<sup>S5</sup>

$T_1$  values were measured using a three-pulse inversion recovery sequence ( $\pi$ - $T$ - $\pi/2$ - $\tau$ - $\pi$ - $\tau$ -echo) with  $\tau$  of 400 ns.  $T_2$  values were collected using a two-pulse echo sequence ( $\pi/2$ - $\tau$ - $\pi$ - $\tau$ -echo). The  $\pi/2$  and  $\pi$  pulses were set to be 16 ns and 32 ns, respectively. Both  $T_1$  and  $T_2$  were measured in the temperature range from 6 K to 30 K, and fitted by a single exponent function  $y = y_0 + A \cdot \exp(-x/T)$ .

Field-swept electron spin echo-detected (FSED) EPR spectrum was recorded using a two-pulse echo sequence ( $\pi/2$ - $\tau$ - $\pi$ - $\tau$ -echo) with microwave pulse lengths of 16 ns and 32 ns, and an interpulse delay  $\tau = 400$  ns.

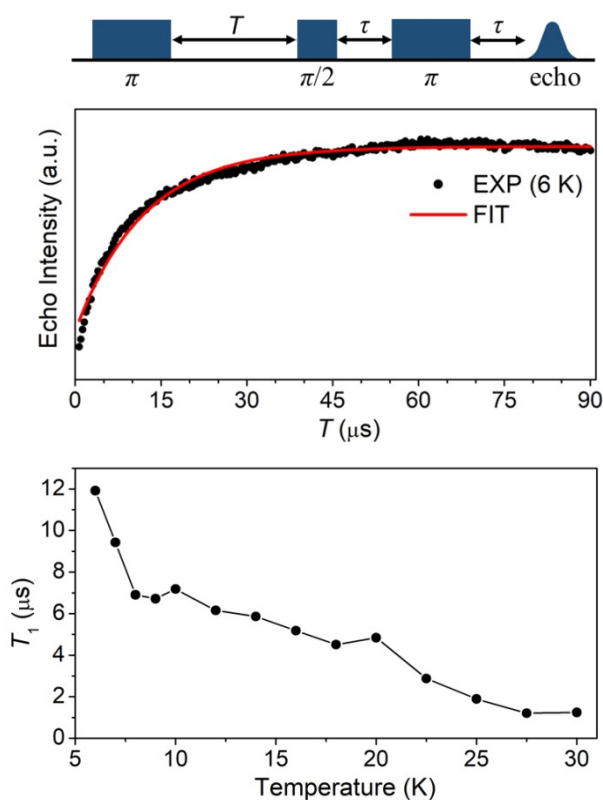

**Fig. S16** Top: The three-pulse inversion recovery sequence applied to **2a**.

Middle: Echo intensity for **2a** as a function of wait time  $T$  at 6 K. The red line indicates the best fit of the recovery curve, which yields  $T_1 = 11.92 \mu\text{s}$ .

Bottom: Spin-lattice relaxation times ( $T_1$ ) as a function of temperature for **2a**.

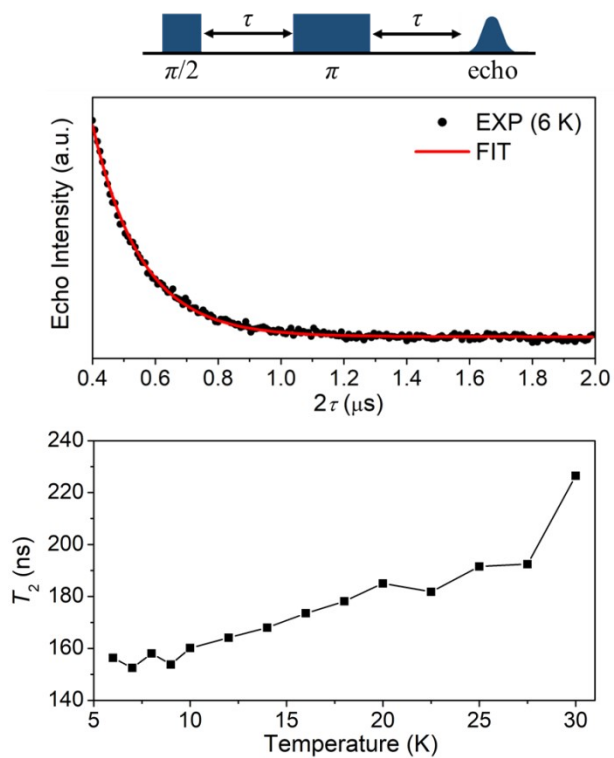

**Fig. S17** Top: The two-pulse echo sequence applied to **2a**.

Middle: Echo intensity for **2a** as a function of interpulse spacing  $2\tau$  at 6 K. The red line indicates the best fit of the decay curve, which yields  $T_2 = 156.4$  ns.

Bottom: Coherence times ( $T_2$ ) as a function of temperature for **2a**.

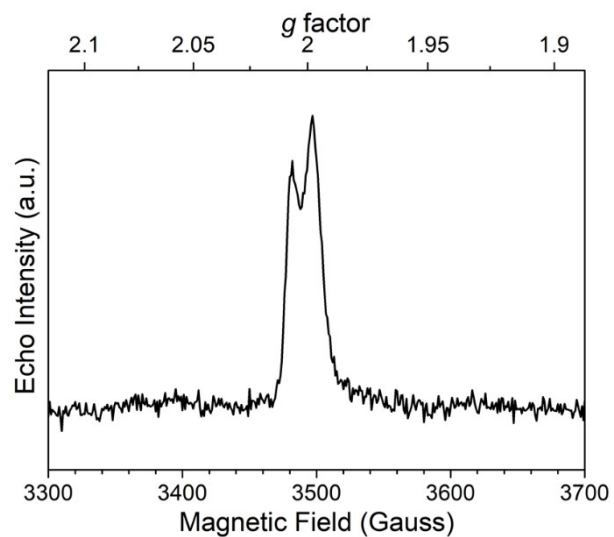

**Fig. S18** FSED EPR spectrum of **2a** at 6 K.

**Table S3** Variable-Temperature Inversion Recovery Curves for **2a**. Red lines are best fits of the recovery curves.

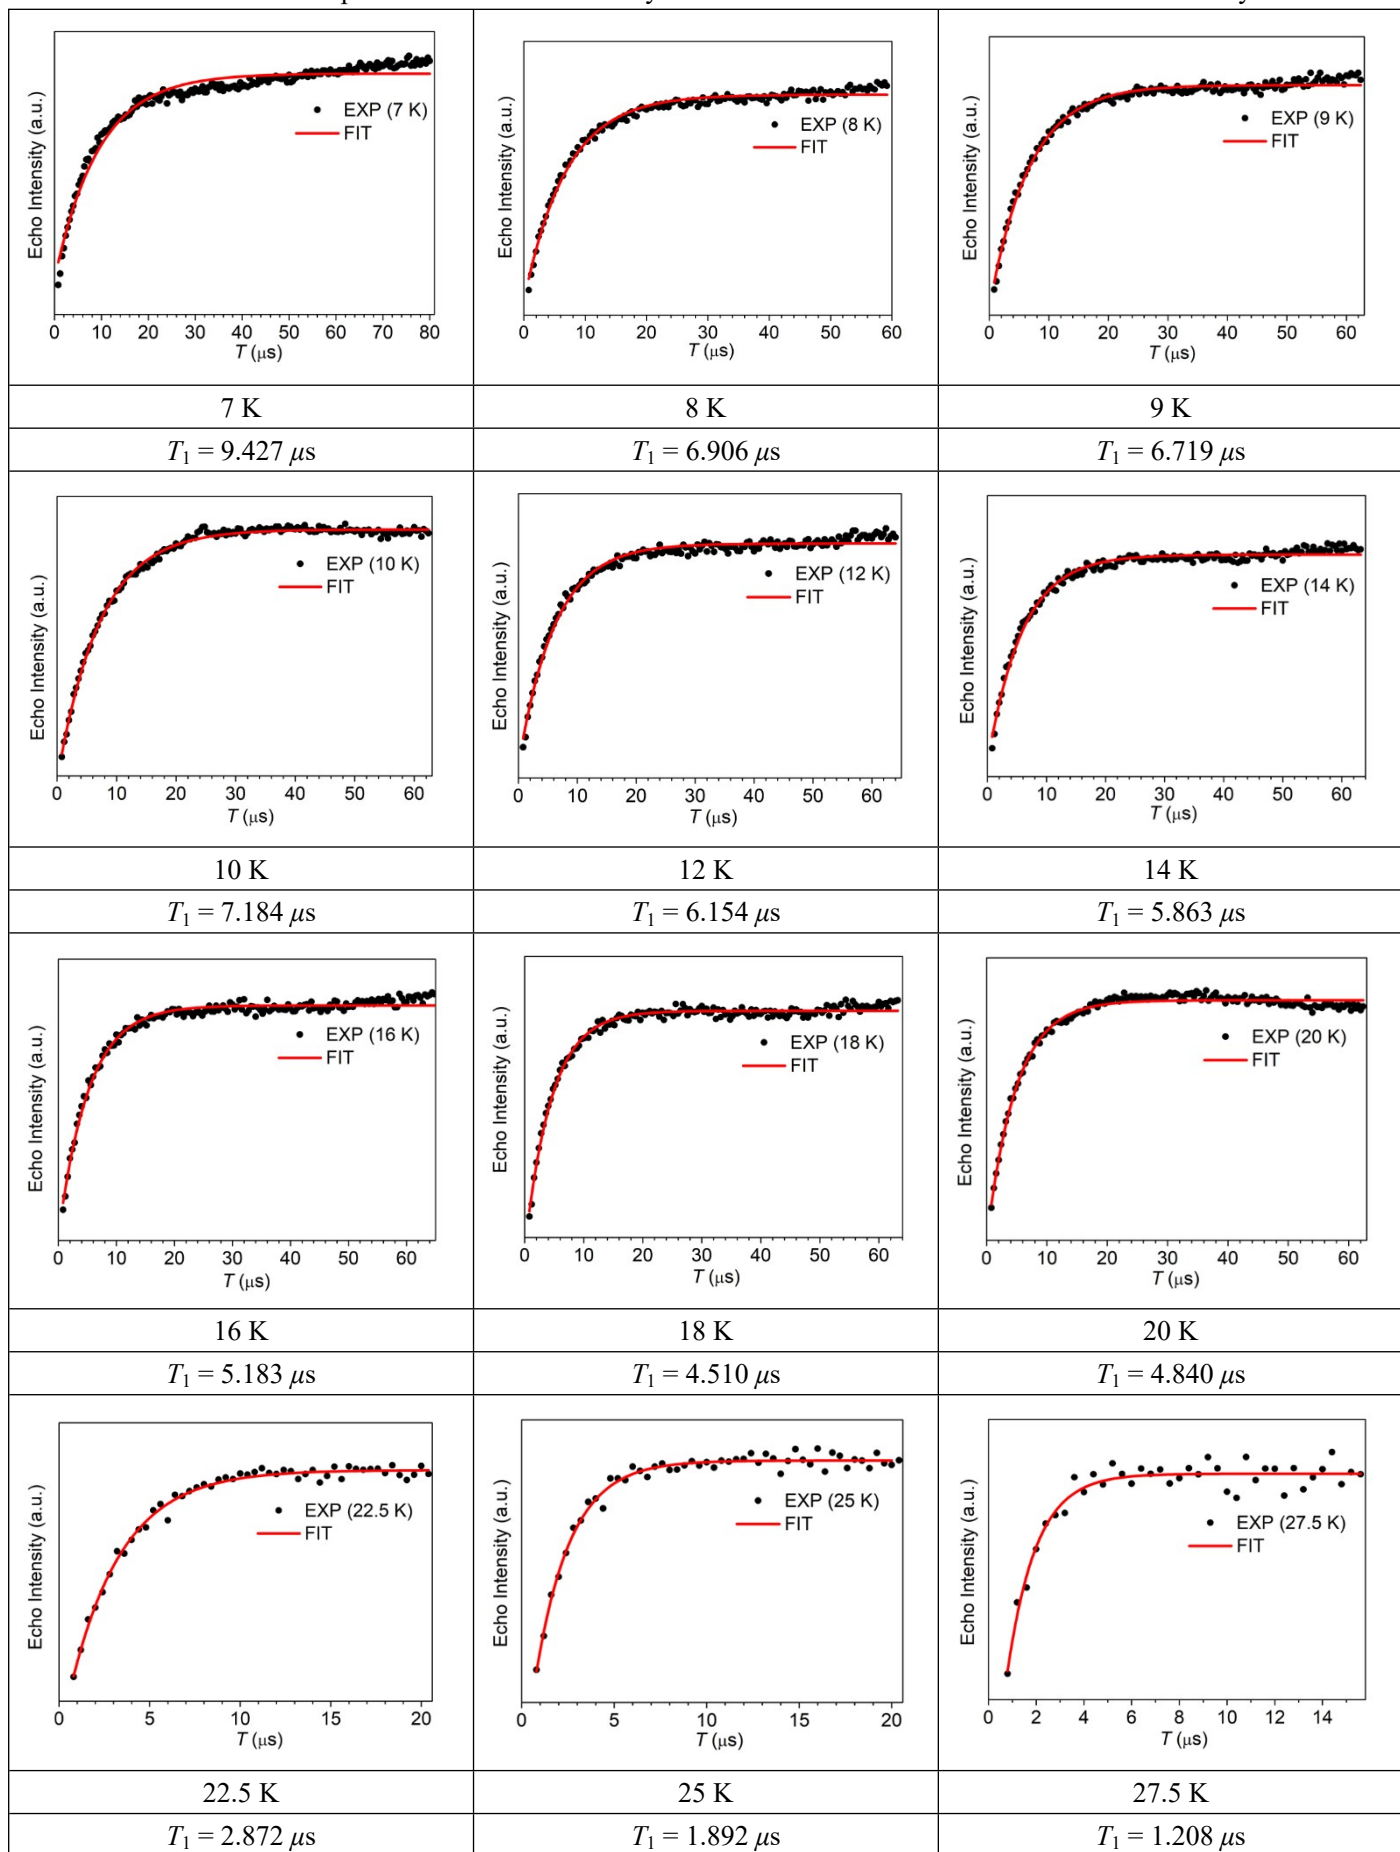



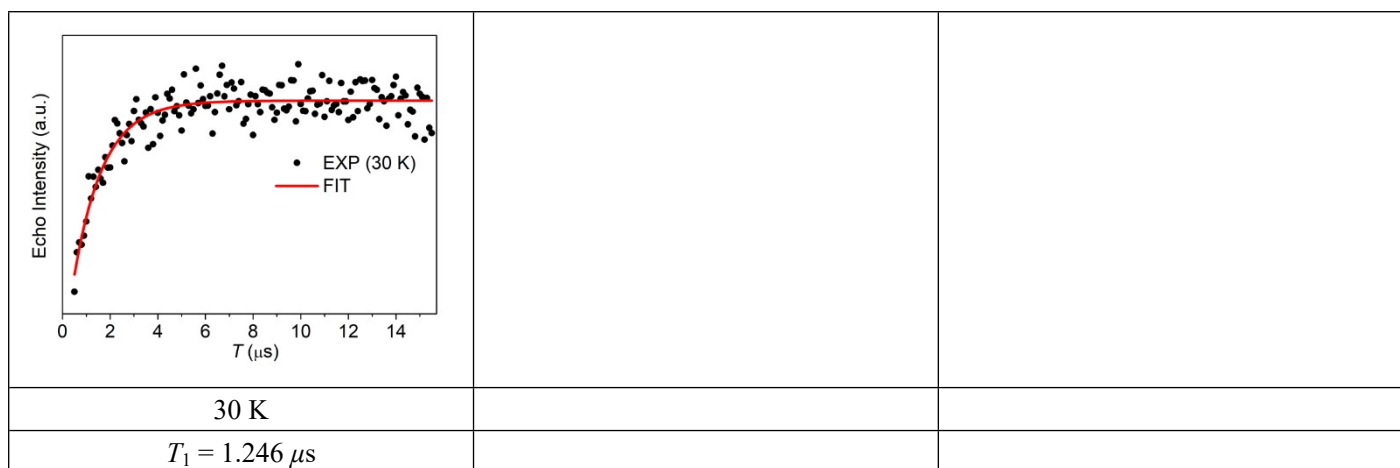

**Table S4** Variable-Temperature Echo-Decay Curves for **2a**. Red lines are best fits of the decay curves.

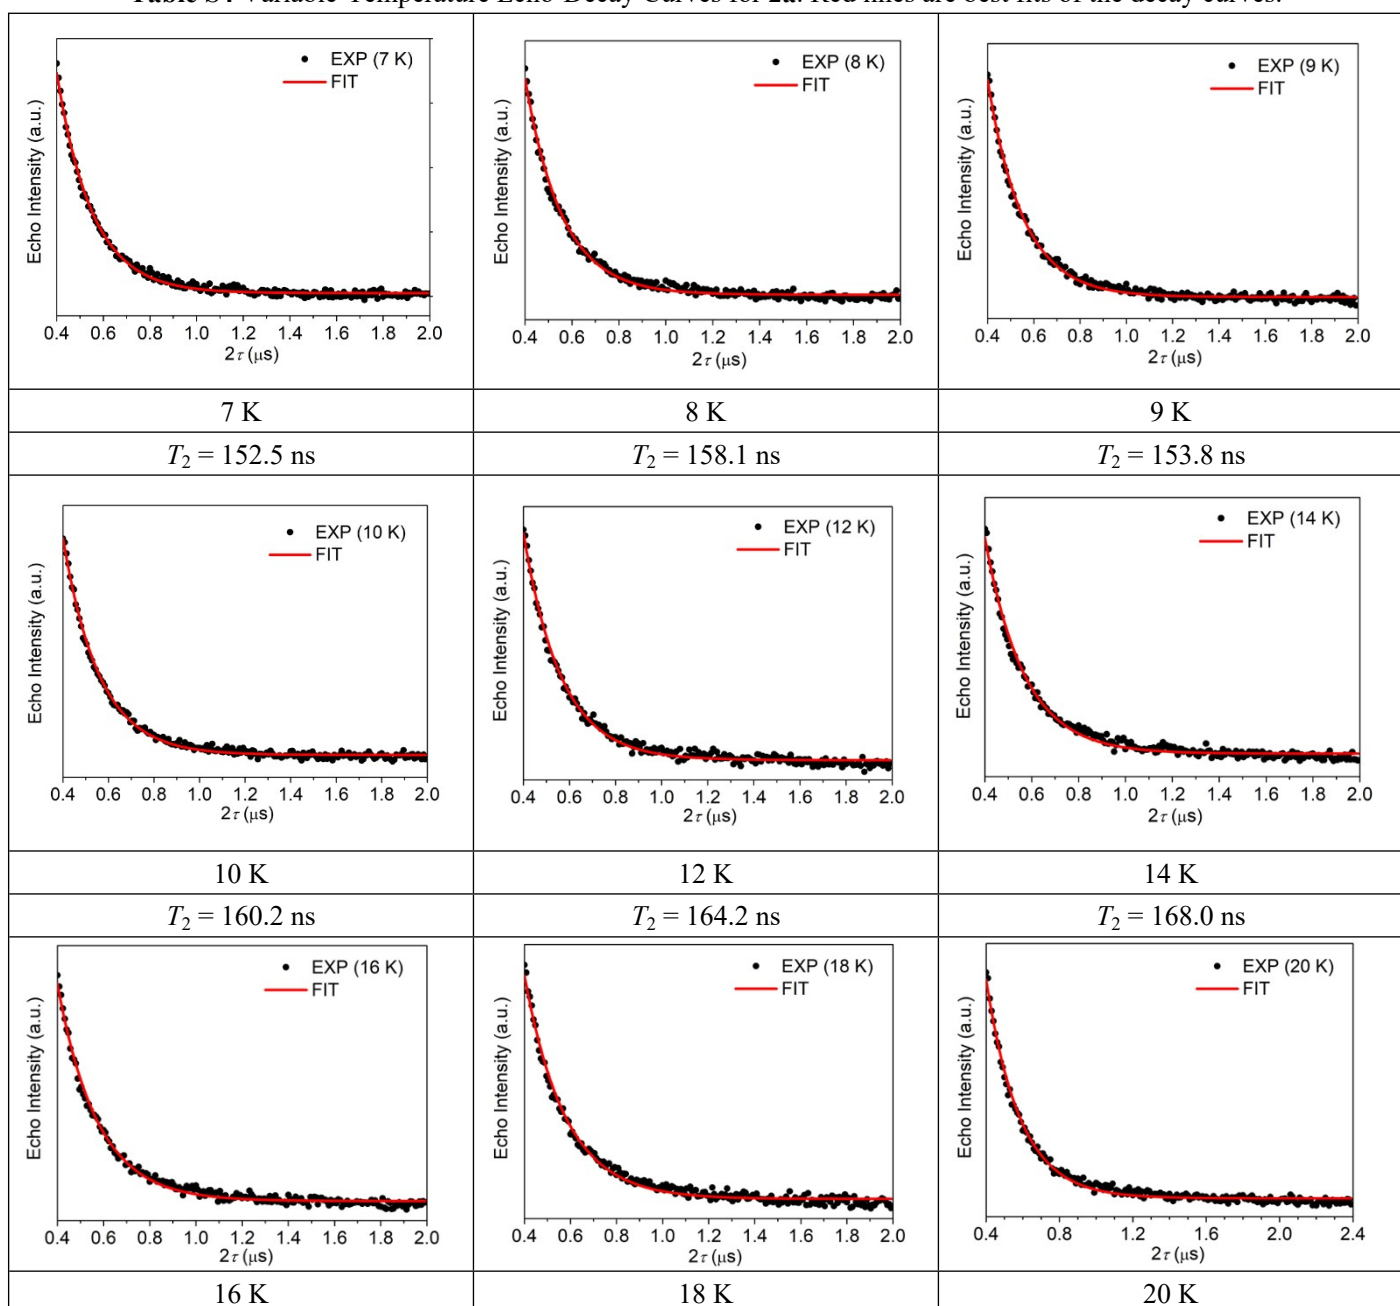

|                                 |                               |                                 |
|---------------------------------|-------------------------------|---------------------------------|
| $T_2 = 173.5$ ns                | $T_2 = 178.1$ ns              | $T_2 = 185.0$ ns                |
| <p>• EXP (22.5 K)<br/>— FIT</p> | <p>• EXP (25 K)<br/>— FIT</p> | <p>• EXP (27.5 K)<br/>— FIT</p> |
| 22.5 K                          | 25 K                          | 27.5 K                          |
| $T_2 = 181.8$ ns                | $T_2 = 191.6$ ns              | $T_2 = 192.4$ ns                |
| <p>• EXP (30 K)<br/>— FIT</p>   |                               |                                 |
| 30 K                            |                               |                                 |
| $T_2 = 226.5$ ns                |                               |                                 |

## SQUID Measurements

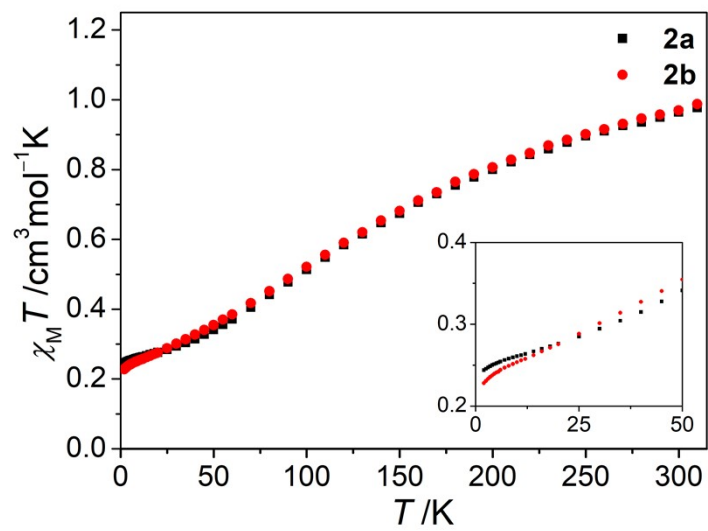

**Fig. S19** Comparison between the  $\chi_M T$  versus  $T$  curves for **2a** and **2b**.

## DFT Calculations

All calculations were carried out at the Gaussian 09 program.<sup>S6</sup> The geometric optimizations of the studied compounds were obtained at the (U)PBE0/6-311G\* level of theory. The obtained stationary points were characterized by frequency calculations. For the doublet state of the triradical trication in **2a** and **2b**, the symmetry-broken approaches were carried out ( $\langle S^2 \rangle = 1.75$ ). The spin contamination errors were corrected by the approximate spin-projection (AP) method when evaluating the energy gap.<sup>S7</sup> The energy data are listed in Table S5. The calculated bond distances are listed in Table S6. The calculated Mulliken population are listed in Table S7. Although the triradical trication in **2a** and **2b** possesses two doublet states and one quartet state, only one doublet state and one quartet state were selected for structural optimization to save computation time. The calculated doublet-quartet energy gap is obtained with  $\Delta E = -192.4 \text{ cm}^{-1}$  ( $-550.0 \text{ cal mol}^{-1}$ ).

**Table S5** Energy Data of DFT Calculations

|         | Annihilation of the first spin contaminant ( $\langle S^2 \rangle$ ) | Sum of electronic and zero-point Energies (eV) | $\Delta E_{Q-D}$ before correction (kcal mol <sup>-1</sup> ) | $\Delta E_{Q-D}$ after correction (kcal mol <sup>-1</sup> ) |
|---------|----------------------------------------------------------------------|------------------------------------------------|--------------------------------------------------------------|-------------------------------------------------------------|
| Doublet | 1.7541                                                               | -3845.639549                                   | 0                                                            | 0                                                           |
| Quartet | 3.7724                                                               | -3845.639080                                   | 0.29430219                                                   | 0.550079563                                                 |

$$E_{AP} = \alpha E_D - \beta E_Q$$

$$\alpha = \frac{\langle S^2 \rangle_Q}{\langle S^2 \rangle_Q - \langle S^2 \rangle_D}$$

$$\beta = \alpha - 1 = \frac{\langle S^2 \rangle_D}{\langle S^2 \rangle_Q - \langle S^2 \rangle_D}$$

$$\Delta E_{Q-D} = E_Q - E_{AP}$$

**Table S6** Calculated Bond Distances (Å) of the Sulfur-Hydrocarbons for **1** and the Triradical Trication in **2a** and **2b**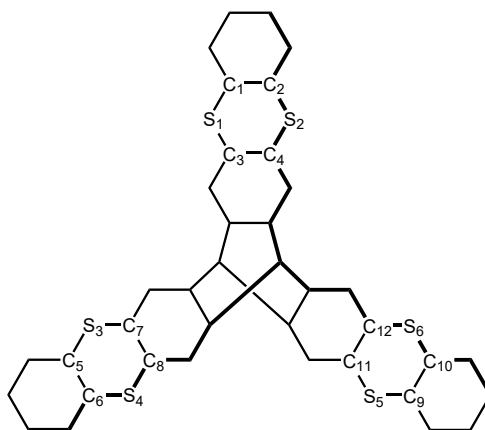

|                                 | <b>1</b> | <b>triradical trication-doublet state</b> | <b>triradical trication-quartet state</b> |
|---------------------------------|----------|-------------------------------------------|-------------------------------------------|
| S <sub>1</sub> -C <sub>1</sub>  | 1.77184  | 1.73070                                   | 1.73037                                   |
| S <sub>1</sub> -C <sub>3</sub>  | 1.77093  | 1.73241                                   | 1.73319                                   |
| S <sub>2</sub> -C <sub>2</sub>  | 1.77184  | 1.73070                                   | 1.73037                                   |
| S <sub>2</sub> -C <sub>4</sub>  | 1.77093  | 1.73241                                   | 1.73319                                   |
| S <sub>3</sub> -C <sub>5</sub>  | 1.77157  | 1.73044                                   | 1.73039                                   |
| S <sub>3</sub> -C <sub>7</sub>  | 1.77091  | 1.73278                                   | 1.73324                                   |
| S <sub>4</sub> -C <sub>6</sub>  | 1.77157  | 1.73044                                   | 1.73039                                   |
| S <sub>4</sub> -C <sub>8</sub>  | 1.77091  | 1.73278                                   | 1.73324                                   |
| S <sub>5</sub> -C <sub>9</sub>  | 1.77177  | 1.73057                                   | 1.73035                                   |
| S <sub>5</sub> -C <sub>11</sub> | 1.77085  | 1.73255                                   | 1.73321                                   |
| S <sub>6</sub> -C <sub>10</sub> | 1.77177  | 1.73057                                   | 1.73035                                   |
| S <sub>6</sub> -C <sub>12</sub> | 1.77085  | 1.73255                                   | 1.73322                                   |

**Table S7** Calculated Mulliken Population of the Triradical Trication

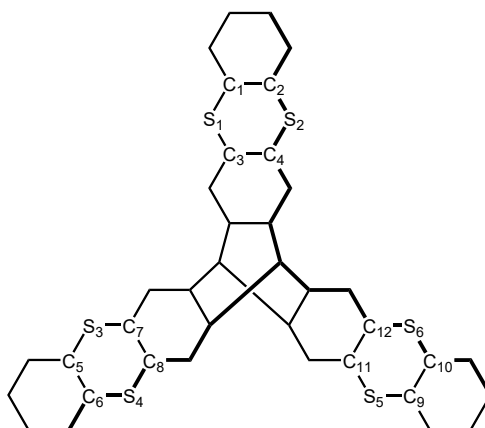

|                 | triradical trication-doublet state | triradical trication-quartet state |
|-----------------|------------------------------------|------------------------------------|
| S <sub>1</sub>  | -0.30136                           | 0.30410                            |
| S <sub>2</sub>  | -0.30136                           | 0.30410                            |
| C <sub>1</sub>  | -0.09623                           | 0.09807                            |
| C <sub>2</sub>  | -0.09623                           | 0.09807                            |
| C <sub>3</sub>  | -0.04688                           | 0.04861                            |
| C <sub>4</sub>  | -0.04688                           | 0.04861                            |
| S <sub>3</sub>  | 0.30274                            | 0.30413                            |
| S <sub>4</sub>  | 0.30274                            | 0.30413                            |
| C <sub>5</sub>  | 0.09738                            | 0.09812                            |
| C <sub>6</sub>  | 0.09738                            | 0.09812                            |
| C <sub>7</sub>  | 0.04741                            | 0.04855                            |
| C <sub>8</sub>  | 0.04741                            | 0.04855                            |
| S <sub>5</sub>  | 0.30271                            | 0.30409                            |
| S <sub>6</sub>  | 0.30272                            | 0.30409                            |
| C <sub>9</sub>  | 0.09722                            | 0.09810                            |
| C <sub>10</sub> | 0.09722                            | 0.09810                            |
| C <sub>11</sub> | 0.04749                            | 0.04857                            |
| C <sub>12</sub> | 0.04749                            | 0.04857                            |

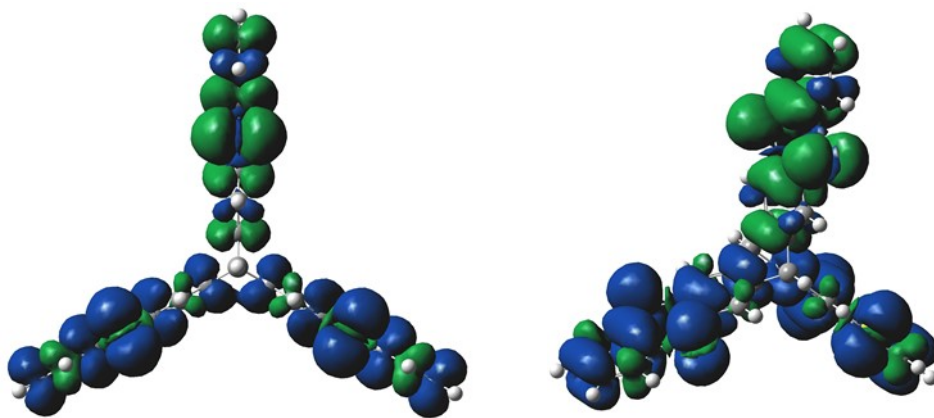

**Fig. S20** Calculated spin density distribution of the triradical trication in the doublet state. Isovalue = 0.0004.

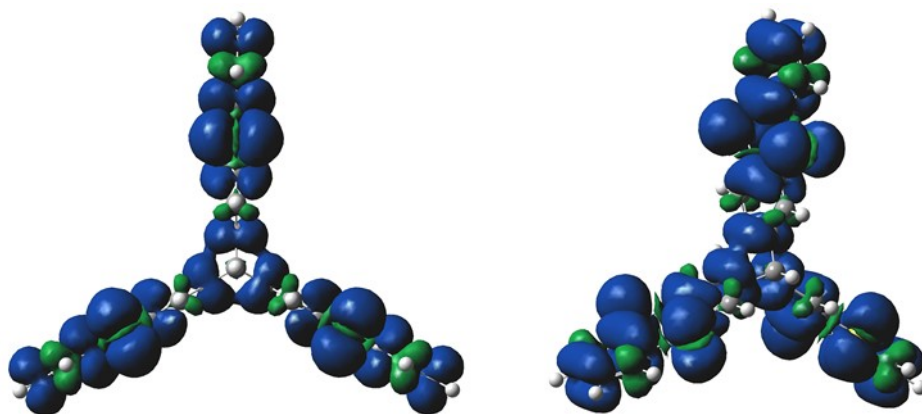

**Fig. S21** Calculated spin density distribution of the triradical trication in the quartet state. Isovalue = 0.0004.

## Coordinates of the studied molecules

### Neutral compound 1

|   |              |              |             |   |              |              |              |
|---|--------------|--------------|-------------|---|--------------|--------------|--------------|
| S | -1.508852000 | 5.109951000  | 1.598895000 | S | -1.508852000 | 5.109951000  | -1.598895000 |
| C | -0.378149000 | 1.353155000  | 0.699545000 | C | -0.378149000 | 1.353155000  | -0.699545000 |
| C | -1.027041000 | 3.663693000  | 0.697576000 | C | -1.027041000 | 3.663693000  | -0.697576000 |
| C | -0.000124000 | 0.006817000  | 1.293371000 | C | -0.000124000 | 0.006817000  | -1.293371000 |
| H | -0.000193000 | 0.006968000  | 2.384635000 | H | -0.000193000 | 0.006968000  | -2.384635000 |
| C | -0.677425000 | 2.505785000  | 1.398894000 | C | -0.677425000 | 2.505785000  | -1.398894000 |
| H | -0.652383000 | 2.523280000  | 2.484435000 | H | -0.652383000 | 2.523280000  | -2.484435000 |
| C | -0.636950000 | 6.362377000  | 0.698547000 | C | -0.636950000 | 6.362377000  | -0.698547000 |
| C | 0.018894000  | 7.377796000  | 1.390895000 | C | 0.018894000  | 7.377796000  | -1.390895000 |
| H | 0.036974000  | 7.356880000  | 2.475814000 | H | 0.036974000  | 7.356880000  | -2.475814000 |
| C | 0.633555000  | 8.409876000  | 0.695188000 | C | 0.633555000  | 8.409876000  | -0.695188000 |
| H | 1.127738000  | 9.206575000  | 1.241805000 | H | 1.127738000  | 9.206575000  | -1.241805000 |
| S | 5.171857000  | -1.248086000 | 1.598368000 | S | 5.171857000  | -1.248086000 | -1.598368000 |
| C | 1.355317000  | -0.338456000 | 0.699683000 | C | 1.355317000  | -0.338456000 | -0.699683000 |
| C | 3.679378000  | -0.936789000 | 0.697541000 | C | 3.679378000  | -0.936789000 | -0.697541000 |
| C | 2.502796000  | -0.656928000 | 1.399046000 | C | 2.502796000  | -0.656928000 | -1.399046000 |
| H | 2.505181000  | -0.688728000 | 2.484577000 | H | 2.505181000  | -0.688728000 | -2.484577000 |
| C | 5.812305000  | -2.633466000 | 0.698526000 | C | 5.812305000  | -2.633466000 | -0.698526000 |
| C | 6.355867000  | -3.713269000 | 1.390938000 | C | 6.355867000  | -3.713269000 | -1.390938000 |
| H | 6.328494000  | -3.718477000 | 2.475849000 | H | 6.328494000  | -3.718477000 | -2.475849000 |
| C | 6.933704000  | -4.766440000 | 0.695145000 | C | 6.933704000  | -4.766440000 | -0.695145000 |
| H | 7.370271000  | -5.596146000 | 1.241741000 | H | 7.370271000  | -5.596146000 | -1.241741000 |
| S | -3.655015000 | -3.860926000 | 1.598425000 | S | -3.655015000 | -3.860926000 | -1.598425000 |
| C | -0.975641000 | -0.994880000 | 0.699526000 | C | -0.975641000 | -0.994880000 | -0.699526000 |
| C | -2.647293000 | -2.716856000 | 0.697478000 | C | -2.647293000 | -2.716856000 | -0.697478000 |
| C | -1.821474000 | -1.833298000 | 1.398932000 | C | -1.821474000 | -1.833298000 | -1.398932000 |
| H | -1.850307000 | -1.819935000 | 2.484470000 | H | -1.850307000 | -1.819935000 | -2.484470000 |
| C | -5.175956000 | -3.737285000 | 0.698467000 | C | -5.175956000 | -3.737285000 | -0.698467000 |
| C | -6.383407000 | -3.681174000 | 1.390968000 | C | -6.383407000 | -3.681174000 | -1.390968000 |
| H | -6.374176000 | -3.653711000 | 2.475881000 | H | -6.374176000 | -3.653711000 | -2.475881000 |
| C | -7.584622000 | -3.668897000 | 0.695169000 | C | -7.584622000 | -3.668897000 | -0.695169000 |
| H | -8.521848000 | -3.642292000 | 1.241707000 | H | -8.521848000 | -3.642292000 | -1.241707000 |

### Triradical trication - doublet state

|   |              |              |              |   |              |              |              |
|---|--------------|--------------|--------------|---|--------------|--------------|--------------|
| S | -5.043221000 | -1.316548000 | 1.722492000  | C | 2.677381000  | -2.704389000 | 0.703779000  |
| S | -5.042994000 | -1.316528000 | -1.723164000 | C | -1.356430000 | -0.357560000 | -0.705586000 |
| S | 3.666911000  | -3.696341000 | 1.722897000  | C | 1.813006000  | -1.835656000 | 1.401460000  |
| S | 3.667133000  | -3.696302000 | -1.722493000 | H | 1.817565000  | -1.840760000 | 2.487779000  |
| S | 1.379228000  | 5.015296000  | 1.722892000  | C | 0.979449000  | -0.996986000 | -0.705425000 |
| S | 1.379451000  | 5.015325000  | -1.722622000 | C | -3.686970000 | -0.963829000 | 0.703329000  |
| C | 0.365617000  | 1.343594000  | 0.705558000  | C | -0.004435000 | -0.004326000 | 1.302354000  |
| C | 1.813187000  | -1.835627000 | -1.401255000 | H | -0.004437000 | -0.004374000 | 2.392356000  |
| H | 1.817885000  | -1.840709000 | -2.487574000 | C | -0.004268000 | -0.004303000 | -1.302348000 |
| C | -2.500938000 | -0.655302000 | 1.401198000  | H | -0.004129000 | -0.004332000 | -2.392350000 |
| H | -2.507565000 | -0.657128000 | 2.487508000  | C | 1.005722000  | 3.664996000  | 0.703855000  |
| C | 0.679690000  | 2.483513000  | 1.401400000  | C | -6.398794000 | -1.670223000 | 0.706744000  |
| H | 0.681225000  | 2.490028000  | 2.487721000  | C | 1.005813000  | 3.665008000  | -0.703656000 |
| C | -2.500755000 | -0.655281000 | -1.401527000 | C | 4.652823000  | -4.692128000 | -0.706813000 |
| H | -2.507240000 | -0.657090000 | -2.487838000 | C | -6.398700000 | -1.670215000 | -0.707599000 |
| C | 0.365708000  | 1.343607000  | -0.705481000 | C | -7.580144000 | -1.978282000 | 1.397877000  |
| C | 2.677472000  | -2.704374000 | -0.703481000 | H | -7.584013000 | -1.979303000 | 2.483480000  |
| C | -3.686877000 | -0.963820000 | -0.703817000 | C | -7.579957000 | -1.978268000 | -1.398893000 |
| C | -1.356521000 | -0.357572000 | 0.705412000  | H | -7.583681000 | -1.979279000 | -2.484496000 |
| C | 0.679870000  | 2.483537000  | -1.401263000 | C | 1.750173000  | 6.366659000  | -0.706856000 |
| H | 0.681544000  | 2.490071000  | -2.487584000 | C | 5.511916000  | -5.559122000 | 1.398675000  |
| C | 0.979358000  | -0.997000000 | 0.705540000  | H | 5.514483000  | -5.562187000 | 2.484267000  |



|   |              |              |              |   |             |              |              |
|---|--------------|--------------|--------------|---|-------------|--------------|--------------|
| C | -8.730109000 | -2.278143000 | 0.701194000  | C | 6.348888000 | -6.403160000 | -0.701351000 |
| H | -9.638639000 | -2.515032000 | 1.243392000  | H | 7.009824000 | -7.069949000 | -1.243643000 |
| C | 4.652731000  | -4.692144000 | 0.707321000  | C | 6.348797000 | -6.403177000 | 0.702040000  |
| C | 5.512098000  | -5.559089000 | -1.398075000 | H | 7.009662000 | -7.069978000 | 1.244401000  |
| H | 5.514805000  | -5.562129000 | -2.483668000 | C | 2.389504000 | 8.689553000  | -0.701384000 |
| C | 2.074046000  | 7.543590000  | -1.398100000 | H | 2.638644000 | 9.594718000  | -1.243717000 |
| H | 2.075051000  | 7.547568000  | -2.483697000 | C | 2.073864000 | 7.543567000  | 1.398501000  |
| C | 1.750081000  | 6.366647000  | 0.707196000  | H | 2.074728000 | 7.547527000  | 2.484099000  |
| C | -8.730016000 | -2.278136000 | -0.702367000 | C | 2.389412000 | 8.689542000  | 0.701845000  |
| H | -9.638472000 | -2.515020000 | -1.244688000 | H | 2.638482000 | 9.594698000  | 1.244225000  |

### Triradical trication - quartet state

|   |              |              |              |   |              |              |              |
|---|--------------|--------------|--------------|---|--------------|--------------|--------------|
| S | 1.734558000  | 4.897623000  | 1.722703000  | C | 2.468232000  | -2.894066000 | 0.703358000  |
| S | 1.734464000  | 4.897415000  | -1.723387000 | C | 2.221367000  | 6.211112000  | 0.706857000  |
| S | -5.134252000 | -0.952014000 | 1.723287000  | C | 2.468190000  | -2.894151000 | -0.703149000 |
| S | -5.134348000 | -0.952221000 | -1.722884000 | C | -6.514065000 | -1.194527000 | -0.707056000 |
| S | 3.382622000  | -3.956184000 | 1.723080000  | C | 2.221329000  | 6.211026000  | -0.707726000 |
| S | 3.382517000  | -3.956394000 | -1.722797000 | C | 2.643689000  | 7.356817000  | 1.397958000  |
| C | 0.896719000  | -1.069590000 | 0.705427000  | H | 2.645175000  | 7.360526000  | 2.483611000  |
| C | -2.550252000 | -0.477969000 | -1.401254000 | C | 2.643615000  | 7.356647000  | -1.398988000 |
| H | -2.557156000 | -0.478801000 | -2.487615000 | H | 2.645043000  | 7.360224000  | -2.484642000 |
| C | 0.850112000  | 2.423691000  | 1.401159000  | C | 4.311161000  | -5.005243000 | -0.707100000 |
| H | 0.853232000  | 2.429946000  | 2.487525000  | C | -7.716364000 | -1.407030000 | 1.398772000  |
| C | 1.668215000  | -1.965435000 | 1.401445000  | H | -7.720232000 | -1.407475000 | 2.484424000  |
| H | 1.673582000  | -1.970021000 | 2.487803000  | C | 3.054908000  | 8.471844000  | 0.701235000  |
| C | 0.850034000  | 2.423522000  | -1.401496000 | H | 3.379933000  | 9.352793000  | 1.243396000  |
| H | 0.853094000  | 2.429646000  | -2.487863000 | C | -6.514026000 | -1.194441000 | 0.707565000  |
| C | 0.896679000  | -1.069675000 | -0.705347000 | C | -7.716442000 | -1.407199000 | -1.398171000 |
| C | -3.755862000 | -0.699215000 | -0.703133000 | H | -7.720371000 | -1.407775000 | -2.483822000 |
| C | 1.262725000  | 3.577834000  | -0.703521000 | C | 5.118467000  | -5.921193000 | -1.398332000 |
| C | 0.453014000  | 1.310080000  | 0.705289000  | H | 5.120962000  | -5.924221000 | -2.483979000 |
| C | 1.668133000  | -1.965605000 | -1.401302000 | C | 4.311206000  | -5.005155000 | 0.707455000  |
| H | 1.673437000  | -1.970321000 | -2.487659000 | C | 3.054871000  | 8.471759000  | -0.702423000 |
| C | -1.387522000 | -0.263673000 | 0.705494000  | H | 3.379867000  | 9.352641000  | -1.244708000 |
| C | -3.755822000 | -0.699131000 | 0.703429000  | C | -8.886738000 | -1.614088000 | -0.701503000 |
| C | 0.452975000  | 1.309995000  | -0.705469000 | H | -9.811390000 | -1.777460000 | -1.243690000 |
| C | -2.550173000 | -0.477801000 | 1.401456000  | C | -8.886699000 | -1.614003000 | 0.702195000  |
| H | -2.557017000 | -0.478505000 | 2.487818000  | H | -9.811320000 | -1.777310000 | 1.244454000  |
| C | -1.387562000 | -0.263757000 | -0.705382000 | C | 5.904882000  | -6.812254000 | -0.701615000 |
| C | 1.262764000  | 3.577919000  | 0.703023000  | H | 6.526077000  | -7.516425000 | -1.243742000 |
| C | -0.012848000 | -0.007914000 | 1.302196000  | C | 5.118555000  | -5.921019000 | 1.398750000  |
| H | -0.012929000 | -0.007926000 | 2.392309000  | H | 5.121119000  | -5.923912000 | 2.484397000  |
| C | -0.012921000 | -0.008070000 | -1.302193000 | C | 5.904927000  | -6.812167000 | 0.702094000  |
| H | -0.013064000 | -0.008213000 | -2.392305000 | H | 6.526157000  | -7.516270000 | 1.244269000  |

## References

- S1 T.-Z. Xie, K. Guo, M. Huang, X. Lu, S.-Y. Liao, R. Sarkar, C. N. Moorefield, S. Z. D. Cheng, C. Wesdemiotis and G. R. Newkome, *Chem. –Eur. J.*, 2014, **20**, 11291–11294.
- S2 D. M. Giolando and K. Kirschbaum, *Synthesis*, 1992, **5**, 451–452.
- S3 A. Decken, H. D. B. Jenkins, G. B. Nikiforov and J. Passmore, *Dalton Trans.*, 2004, 2496–2504.
- S4 S. Stoll and A. Schweiger, *J. Magn. Reson.*, 2006, **178**, 42–55.
- S5 References on pulse EPR measurements: (a) J. M. Zadrozny and D. E. Freedman, *Inorg. Chem.*, 2015, **54**, 12027–12031; (b) J. M. Zadrozny, J. Niklas, O. G. Poluektov and D. E. Freedman, *ACS Cent. Sci.*, 2015, **1**, 488–492.
- S6 Gaussian 09, Revision B.01, M. J. Frisch, G. W. Trucks, H. B. Schlegel, G. E. Scuseria, M. A. Robb, J. R. Cheeseman, G. Scalmani, V. Barone, B. Mennucci, G. A. Petersson, H. Nakatsuji, M. Caricato, X. Li, H. P. Hratchian, A. F. Izmaylov, J. Bloino, G. Zheng, J. L. Sonnenberg, M. Hada, M. Ehara, K. Toyota, R. Fukuda, J. Hasegawa, M. Ishida, T. Nakajima, Y. Honda, O. Kitao, H. Nakai, T. Vreven, Jr. J. A. Montgomery, J. E. Peralta, F. Ogliaro, M. Bearpark, J. J. Heyd, E. Brothers, K. N. Kudin, V. N. Staroverov, T. Kieth, R. Kobayashi, J. Normand, K. Raghavachari, A. Rendell, J. C. Burant, S. S. Iyengar, J. Tomasi, M. Cossi, N. Rega, N. J. Millam, M. Klene, J. E. Knox, J. B. Cross, V. Bakken, C. Adamo, J. Jaramillo, R. Gomperts, R. E. Stratmann, O. Yazyev, A. J. Austin, R. Cammi, C. Pomelli, J. W. Ochterski, R. L. Martin, K. Morokuma, V. G. Zakrzewski, G. A. Voth, P. Salvador, J. J. Dannenberg, S. Dapprich, A. D. Daniels, Ö. Farkas, J. B. Foresman, J. V. Ortiz, J. Cioslowski and D. J. Fox, Gaussian, Inc., Wallingford CT, 2010.
- S7 T. Saito, S. Nishihara, Y. Kataoka, Y. Nakanishi, T. Matsui, Y. Kitagawa, T. Kawakami, M. Okumura and K. Yamaguchi, *Chem. Phys. Lett.*, 2009, **483**, 168–171.

## Author Contributions

S. T. performed the chemical experiments, recorded all spectroscopic and magnetic data, carried out the theoretical calculations, and wrote the manuscript. H. R. and Y. Z performed the X-ray diffraction studies. Z. H. and Y. S. participated in the discussion of the SQUID results. Y. S. helped revising the magnetic properties section. X. W. conceived the project and revised the manuscript. All authors discussed the results and manuscript.
